# Supplementary material
Source: PubMed Central journal article supplement (PMC3827980)
Supplement: NIHMS520277-supplement-1.pdf [file NIHMS520277-supplement-1.pdf]

# **Differential regulation of myeloid leukemias by the bone marrow microenvironment**

Daniela S. Krause, Keertik Fulzele, Andre Catic, Chia Chi Sun, David Dombkowski, Michael P. Hurley, Sanon Lezeau, Eyal Attar, Joy Y. Wu, Herbert Y. Lin, Paola Divieti-Pajevic, Robert P. Hasserjian, Ernestina Schipani, Richard A. Van Etten, David T. Scadden

Supplementary Information
