# Supplementary material
Source: PubMed Central journal article supplement (PMC3827980)
Supplement: NIHMS520277-supplement-2.pdf [file NIHMS520277-supplement-2.pdf]

**Supplementary Table 1. Clinicopathological characteristics of WT or Col1-caPPR recipients of *BCR-ABL1*-transduced WT BM treated with saline or Osteoprotegerin (OPG-Fc)**

| WBC*                                          | Neutrophils (%)* | GFP <sup>+</sup> CD11b <sup>+</sup> (%)* | Spleen weight | Day of death <sup>†</sup> |
|-----------------------------------------------|------------------|------------------------------------------|---------------|---------------------------|
| <b>WT Recipients – Saline treated</b>         |                  |                                          |               |                           |
| 9,420                                         | 44.3             | 42.3                                     | 748           | 41                        |
| 78,420                                        | 10.3             | 27.6                                     | 516           | 27                        |
| 1,930                                         | 53.5             | 14.1                                     | 235           | 51                        |
| 3,910                                         | 28.5             | 17.1                                     | 526           | 51                        |
| 13,310                                        | 52.0             | 45.9                                     | 368           | 42                        |
| 23,350                                        | 30.8             | 1.8                                      | 396           | 18                        |
| 81,070                                        | 37.2             | 5.3                                      | unknown       | 17                        |
| 23,720                                        | 35.1             | 1.7                                      | 296           | 20                        |
| 10,740                                        | 58.8             | 1.5                                      | 377           | 21                        |
| 88170                                         | 27.3             | 3.5                                      | 250           | 21                        |
| <b>Col1-caPPR Recipients – Saline treated</b> |                  |                                          |               |                           |
| 6,070                                         | 65.9             | 21.9                                     | 168           | 22                        |
| 10,840                                        | 57.0             | 26.2                                     | 358           | 21                        |
| 9,720                                         | 48.6             | 28.3                                     | 307           | 27                        |
| 53,560                                        | 70.5             | 69.2                                     | 365           | 30                        |
| 7,410                                         | 74.7             | 35.6                                     | 181           | 32                        |
| 6,330                                         | 61.3             | 2.0                                      | 464           | 33                        |
| 6,500                                         | 89.0             | 2.2                                      | 156           | 26                        |
| 1,730                                         | 47.4             | 0.7                                      | 102           | 41                        |
| 930                                           | 71.6             | 1.1                                      | 356           | 24                        |
| 5,520                                         | 54.5             | 1.8                                      | unknown       | 17                        |
| <b>WT Recipients – OPG-Fc treated</b>         |                  |                                          |               |                           |
| 17,300                                        | 56.8             | 38.8                                     | 594           | 21                        |
| 16,950                                        | 37.8             | 34.2                                     | unknown       | 21                        |
| 2,170                                         | 35.8             | 24.4                                     | 587           | 27                        |
| 11,960                                        | 44.1             | 45.8                                     | 482           | 25                        |
| 22,290                                        | 40.4             | 36.1                                     | 581           | 18                        |
| 32,150                                        | 66.0             | 5.0                                      | 961           | 42                        |
| 26,530                                        | 44.2             | 1.7                                      | 405           | 37                        |
| 41,430                                        | 61.1             | 5.3                                      | unknown       | 18                        |
| unknown                                       | unknown          | 3.4                                      | 513           | 34                        |
| 22,630                                        | 34.9             | 2.1                                      | 358           | 21                        |
| <b>Col1-caPPR Recipients – OPG-Fc treated</b> |                  |                                          |               |                           |
| 13,070                                        | 71.8             | 52.5                                     | 452           | 29                        |
| 30,350                                        | 73.4             | 57.9                                     | 385           | 21                        |
| 36,720                                        | 57.8             | 49.4                                     | 420           | 19                        |
| 53,130                                        | 27.4             | 46.7                                     | 420           | 20                        |
| 67,370                                        | 66.3             | 71.3                                     | 326           | 18                        |
| 18,170                                        | 74.6             | 5.2                                      | 704           | 37                        |
| 890                                           | 70.6             | 0.4                                      | 204           | 34                        |
| 2,610                                         | 40.7             | 0.7                                      | 338           | 32                        |
| 3,230                                         | 68.2             | 2.6                                      | 163           | 21                        |
| 540                                           | 34.0             | 0.1                                      | unknown       | 81                        |

\*Leukocyte count ( $\mu\text{l}^{-1}$ ), percentage of neutrophils, and percentage of malignant myeloid cells in peripheral blood at time of morbidity or death

<sup>†</sup>Necropsy results were considered for final determination of causes of death
